# Supplementary material for: The ASXL1-G643Wvariant accelerates the development of CEBPA mutant acute myeloid leukemia
Source: PubMed Central journal article supplement — Haematologica. 2020 May 7;106(4):1000–7. doi: 10.3324/haematol.2019.235150 (PMC8017816; doi:10.3324/haematol.2019.235150), 2020-05-07
Supplement: 2019_235150-Disclosures_Contributions.pdf [file 2019_235150-Disclosures_Contributions.pdf]

Haematologica  
HAEMATOL/2019/235150  
Version 4

The ASXL1-G643W variant accelerates the development of CEBPA  
mutant acute myeloid leukemia

Teresa D'Altri, Anna S. Wilhelmson, Mikkel B. Schuster, Anne Wenzel,  
Adrija Kalvisa, Sachin Pundhir, Anne Meldgaard Hansen, and Bo T.  
Porse

Disclosures: The authors declare no conflicts of interest

Contributions: TD, MBS, AMH and ASW carried out the experiments. TD, AW, AK, SP and BTP analyzed data. TDA and BP drafted the manuscript which was proofread by all authors. BTP directed the research.
